# Supplementary material
Source: MDPI journal article supplement (https://www.mdpi.com/2079-6412/12/9/1364)
Supplement: s1 [file s1]

# Evaluating the Topological Surface Properties of Cu/Cr Thin Films Using 3D Atomic Force Microscopy Topographical Maps

Mohammad Sadeghi <sup>1</sup>, Amir Zelati <sup>2</sup>, Sahar Rezaee <sup>3,\*</sup>, Carlos Luna <sup>4</sup>, Robert Saraiva Matos <sup>5</sup>, Marcelo Amanajás Pires <sup>6</sup>, Nilson S. Ferreira <sup>7</sup>, Henrique Duarte da Fonseca Filho <sup>8</sup>, Azin Ahmadpourian <sup>3</sup> and Ștefan Țălu <sup>9,\*</sup>

<sup>1</sup> Mälardalens Högskola (EST), Mälardalen University, 722 20 Vasteras, Sweden

<sup>2</sup> Department of Basic Sciences, Birjand University of Technology, Birjand 9719866981, Iran

<sup>3</sup> Department of Physics, Kermanshah Branch, Islamic Azad University, Kermanshah 6718773654, Iran

<sup>4</sup> Facultad de Ciencias Físico Matemáticas (FCFM), Universidad Autónoma de Nuevo León (UANL), Av. Universidad s/n, San Nicolás de los Garza 66455, Nuevo León, Mexico

<sup>5</sup> Postgraduate Program in Materials Science and Engineering, Federal University of Sergipe, São Cristóvão 49100-000, SE, Brazil

<sup>6</sup> Department of Physics, Federal University of Ceará—UFC, Fortaleza 60180-020, CE, Brazil

<sup>7</sup> Department of Physics, Federal University of Sergipe, São Cristóvão 49100-000, SE, Brazil

<sup>8</sup> Laboratory of Synthesis of Nanomaterials and Nanoscopy, Physics Department, Federal University of Amazonas-UFAM, Manaus 69067-005, AM, Brazil

<sup>9</sup> The Directorate of Research, Development and Innovation Management (DMCDI), Technical University of Cluj-Napoca, 15 Constantin Daicoviciu St., 400020 Cluj-Napoca, Romania

\* Correspondence: saharrezaee593@iauksh.ac.ir (S.R.); stefan\_ta@yahoo.com or stefan.talu@auto.utcluj.ro (Ș.T.)

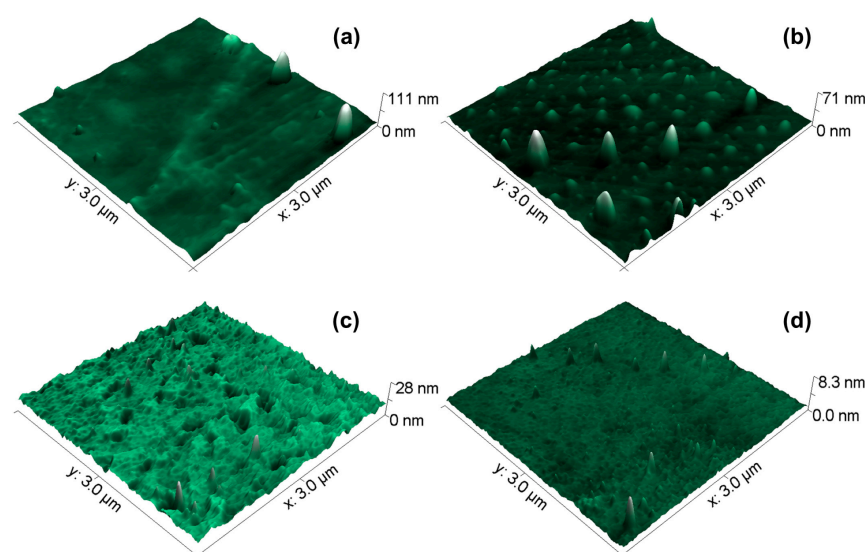

**Figure S1.** 3D AFM topographical maps of (a) BK7, (b) Glass, (c) ITO, and (d) Si substrates.

**Table S1.** Roughness of BK7, Si, and Glass substrates, according to ISO 25178-2:2012. The average results were expressed as mean values and standard deviation.

| Parameter | Unit | Bk7             | Glass           | ITO             | Si              |
|-----------|------|-----------------|-----------------|-----------------|-----------------|
| Sq        | [nm] | $6.77 \pm 1.36$ | $6.82 \pm 2.87$ | $1.89 \pm 0.05$ | $0.85 \pm 0.45$ |
